# Supplementary material
Source: Springer Nature journal article supplement (https://www.springermedizin.de/resource/supplementary/12881_2009_1279_MOESM7_ESM.pdf/9450632)

## Structure of a typical alternatively spliced gene

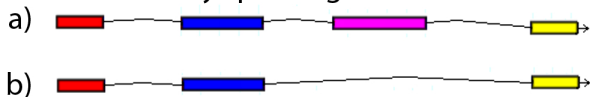

## Typical reads mapping exon/exon junctions

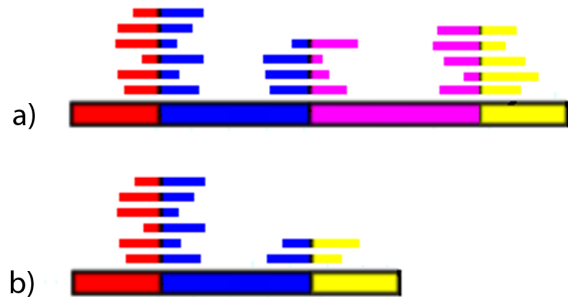

Supplement: MOESM7 [file 9450632]
